# Supplementary material for: Genetic influences on brain representations of natural audiovisual experiences
Source: Research Square preprint supplement (doi:10.21203/rs.3.rs-902535/v2), 2021-09-27
Supplement: Supplementary file 1 [file 6c58ef3909755c05b91b6010.xlsx]

## Sheet: SuppData7
Region name	MZ-DZ difference T value	MZ-DZ difference P value (FDR corrected)	Falconer's heritability	Holzinger's heritability
Left thalamus	7608	3.1886e-09	0.333528	0.314356
Left caudate	8209	7.76108e-08	0.344313	0.298865
Left putamen	10170	0.000399059	0.166401	0.167235
Left pallidum	9298	1.3353e-05	0.375984	0.315968
Brain stem	11760	0.0404353	0.200033	0.294059
Left hippocampus	10198	0.000434803	0.220521	0.224286
Left amygdala	12610	0.208911	0.130233	0.138994
Left accumbens	11167	0.00910288	0.40579	0.320225
Right thalamus	11976	0.0642016	0.103443	0.129114
Right caudate	9556	3.76029e-05	0.149495	0.174703
Right putamen	8070	3.77365e-08	0.355754	0.330223
Right pallidum	8781	1.29775e-06	0.622654	0.46357
Right hippocampus	13637	0.746319	-0.061196	-0.085122
Right amygdala	11673	0.0330695	0.206019	0.253963
Right accumbens	9413	2.14867e-05	0.419965	0.388585
Left fronto-marginal gyrus (of Wernicke) and sulcus	10003	0.000216629	0.148522	0.191764
Left inferior occipital gyrus (O3) and sulcus	2253	1.81629e-27	0.371407	0.462645
Left paracentral lobule and sulcus	6973	8.29792e-11	0.256582	0.270242
Left subcentral gyrus (central operculum) and sulci	8369	1.73441e-07	0.15471	0.197783
Left transverse frontopolar gyri and sulci	11229	0.0106799	0.0934438	0.127283
Left anterior part of the cingulate gyrus and sulcus (ACC)	10285	0.00057185	0.12333	0.152814
Left middle-anterior part of the cingulate gyrus and sulcus (aMCC)	9552	3.75119e-05	0.225286	0.216799
Left middle-posterior part of the cingulate gyrus and sulcus (pMCC)	10217	0.000454457	0.194744	0.190736
Left posterior-dorsal part of the cingulate gyrus (dPCC)	7552	2.34267e-09	0.288899	0.269607
Left posterior-ventral part of the cingulate gyrus (vPCC, isthmus of the cingulate gyrus)	9098	5.50405e-06	0.387609	0.309638
Left cuneus (O6)	1691	1.89974e-29	0.288016	0.387684
Left opercular part of the inferior frontal gyrus	8022	2.92984e-08	0.152677	0.195134
Left orbital part of the inferior frontal gyrus	10275	0.000556204	0.170924	0.203814
Left triangular part of the inferior frontal gyrus	8266	1.04139e-07	0.162559	0.207124
Left middle frontal gyrus (F2)	11194	0.00975283	0.051287	0.0819772
Left superior frontal gyrus (F1)	9892	0.000144617	0.0883619	0.134651
Left long insular gyrus and central sulcus of the insula	12750	0.259336	0.110909	0.137918
Left short insular gyri	11083	0.00720046	0.121497	0.14586
Left middle occipital gyrus (O2, lateral occipital gyrus)	2050	3.36849e-28	0.46454	0.541566
Left superior occipital gyrus (O1)	2575	3.91394e-26	0.301523	0.398965
Left lateral occipito-temporal gyrus (fusiform gyrus, O4-T4)	4679	5.84125e-18	0.241699	0.325268
Left lingual gyrus, ligual part of the medial occipito-temporal gyrus, (O5)	2723	1.41228e-25	0.244617	0.348759
Left parahippocampal gyrus, parahippocampal part of the medial occipito-temporal gyrus, (T5)	7341	6.82569e-10	0.546226	0.519154
Left orbital gyri	7360	7.54753e-10	0.244511	0.297881
Left angular gyrus	3618	8.14157e-22	0.277492	0.3404
Left supramarginal gyrus	6978	8.39684e-11	0.149654	0.213738
Left superior parietal lobule (lateral part of P1)	4649	4.73369e-18	0.202094	0.288034
Left postcentral gyrus	11605	0.028185	0.0674004	0.0911447
Left precentral gyrus	9497	2.99773e-05	0.131753	0.176238
Left precuneus (medial part of P1)	4594	3.44193e-18	0.18498	0.281136
Left straight gyrus, Gyrus rectus	5585	6.61015e-15	0.523511	0.521409
Left subcallosal area, subcallosal gyrus	8387	1.88396e-07	0.577585	0.508197
Left anterior transverse temporal gyrus (of Heschl)	10201	0.000435887	0.120816	0.151486
Left lateral aspect of the superior temporal gyrus	6887	4.93626e-11	0.156451	0.236883
Left planum polare of the superior temporal gyrus	10178	0.000407465	0.258995	0.26259
Left planum temporale or temporal plane of the superior temporal gyrus	13363	0.576044	0.0145601	0.0223143
Left inferior temporal gyrus (T3)	4921	3.53566e-17	0.391278	0.417704
Left middle temporal gyrus (T2)	4602	3.49351e-18	0.266969	0.333842
Left horizontal ramus of the anterior segment of the lateral sulcus (or fissure)	8820	1.53611e-06	0.2882	0.269024
Left vertical ramus of the anterior segment of the lateral sulcus (or fissure)	8759	1.18368e-06	0.288222	0.264217
Left posterior ramus (or segment) of the lateral sulcus (or fissure)	6510	4.15993e-12	0.224023	0.260256
Left occipital pole	2048	3.36849e-28	0.462309	0.583432
Left temporal pole	4760	1.0667e-17	0.692384	0.636072
Left calcarine sulcus	3755	2.71857e-21	0.305226	0.367106
Left central sulcus (Rolando's fissure)	6187	4.95543e-13	0.251921	0.273991
Left marginal branch (or part) of the cingulate sulcus	6917	5.8819e-11	0.287174	0.276509
Left anterior segment of the circular sulcus of the insula	10213	0.000451629	0.193385	0.196858
Left inferior segment of the circular sulcus of the insula	10041	0.000248263	0.215043	0.241702
Left superior segment of the circular sulcus of the insula	8818	1.53611e-06	0.228139	0.240001
Left anterior transverse collateral sulcus	10460	0.00104984	0.413838	0.3471
Left posterior transverse collateral sulcus	6290	9.34011e-13	0.40363	0.386595
Left inferior frontal sulcus	12533	0.184212	0.0242671	0.0382994
Left middle frontal sulcus	13244	0.503123	0.0105108	0.0146717
Left superior frontal sulcus	13623	0.740775	-0.00756288	-0.0115397
Left sulcus intermedius primus (of Jensen)	13502	0.663131	0.0137492	0.0154003
Left intraparietal sulcus (interparietal sulcus) and transverse parietal sulci	6443	2.6756e-12	0.130003	0.21172
Left middle occipital sulcus and lunatus sulcus	4708	7.15584e-18	0.247653	0.338479
Left superior occipital sulcus and transverse occipital sulcus	2187	1.11641e-27	0.352838	0.422566
Left anterior occipital sulcus and preoccipital notch (temporo-occipital incisure)	4234	1.87405e-19	0.214206	0.300891
Left lateral occipito-temporal sulcus	4218	1.74889e-19	0.374206	0.399988
Left medial occipito-temporal sulcus (collateral sulcus) and lingual sulcus	4835	1.92837e-17	0.336202	0.3808
Left lateral orbital sulcus	7429	1.1329e-09	0.292172	0.304308
Left medial orbital sulcus (olfactory sulcus)	8168	6.32774e-08	0.458252	0.42894
Left orbital sulci (H-shaped sulci)	7712	5.58857e-09	0.27503	0.311728
Left parieto-occipital sulcus (or fissure)	5815	3.59192e-14	0.242607	0.285502
Left pericallosal sulcus (S of corpus callosum)	8420	2.21282e-07	0.512605	0.374491
Left postcentral sulcus	7253	4.08885e-10	0.14905	0.196173
Left inferior part of the precentral sulcus	9934	0.000167402	0.0957284	0.1289
Left superior part of the precentral sulcus	7813	9.74844e-09	0.187027	0.211147
Left suborbital sulcus (sulcus rostrales, supraorbital sulcus)	7102	1.69256e-10	0.43199	0.413432
Left subparietal sulcus	8747	1.13554e-06	0.177554	0.186577
Left inferior temporal sulcus	7017	1.03849e-10	0.22544	0.260596
Left superior temporal sulcus (parallel sulcus)	4875	2.49731e-17	0.168506	0.275192
Left transverse temporal sulcus	12499	0.174671	0.0640142	0.0710351
Right fronto-marginal gyrus (of Wernicke) and sulcus	8927	2.54463e-06	0.229785	0.284407
Right inferior occipital gyrus (O3) and sulcus	2785	2.40331e-25	0.289556	0.381483
Right paracentral lobule and sulcus	11826	0.0468272	0.0397283	0.0550704
Right subcentral gyrus (central operculum) and sulci	8169	6.32774e-08	0.201005	0.221432
Right transverse frontopolar gyri and sulci	7084	1.55693e-10	0.267104	0.330244
Right anterior part of the cingulate gyrus and sulcus (ACC)	12195	0.100957	0.0316433	0.0444234
Right middle-anterior part of the cingulate gyrus and sulcus (aMCC)	13121	0.432882	-0.0343293	-0.0447052
Right middle-posterior part of the cingulate gyrus and sulcus (pMCC)	9039	4.27242e-06	0.148077	0.173833
Right posterior-dorsal part of the cingulate gyrus (dPCC)	7180	2.72631e-10	0.17441	0.21389
Right posterior-ventral part of the cingulate gyrus (vPCC, isthmus of the cingulate gyrus)	7191	2.87e-10	0.272847	0.267615
Right cuneus (O6)	7875	1.37054e-08	0.131351	0.201403
Right opercular part of the inferior frontal gyrus	8293	1.1882e-07	0.174027	0.200728
Right orbital part of the inferior frontal gyrus	7945	1.98178e-08	0.304389	0.323297
Right triangular part of the inferior frontal gyrus	7609	3.1886e-09	0.171151	0.218521
Right middle frontal gyrus (F2)	12324	0.12913	-0.0386011	-0.0692403
Right superior frontal gyrus (F1)	12439	0.158955	0.0232237	0.0405132
Right long insular gyrus and central sulcus of the insula	11474	0.0205107	0.185576	0.166182
Right short insular gyri	10902	0.00425414	0.131933	0.131549
Right middle occipital gyrus (O2, lateral occipital gyrus)	2450	1.2303e-26	0.245535	0.383767
Right superior occipital gyrus (O1)	2647	7.24288e-26	0.242222	0.364236
Right lateral occipito-temporal gyrus (fusiform gyrus, O4-T4)	7888	1.45527e-08	0.154109	0.208036
Right lingual gyrus, ligual part of the medial occipito-temporal gyrus, (O5)	5227	4.18611e-16	0.232939	0.305848
Right parahippocampal gyrus, parahippocampal part of the medial occipito-temporal gyrus, (T5)	13866	0.91127	-0.00968894	-0.0150043
Right orbital gyri	6614	8.29915e-12	0.303528	0.357841
Right angular gyrus	7799	9.12387e-09	0.0912101	0.165346
Right supramarginal gyrus	7016	1.03849e-10	0.128058	0.186287
Right superior parietal lobule (lateral part of P1)	7221	3.40513e-10	0.133069	0.200371
Right postcentral gyrus	5855	4.70797e-14	0.243147	0.275025
Right precentral gyrus	9457	2.54928e-05	0.0890498	0.129496
Right precuneus (medial part of P1)	6101	2.73382e-13	0.115103	0.213218
Right straight gyrus, Gyrus rectus	7281	4.78625e-10	0.399953	0.352137
Right subcallosal area, subcallosal gyrus	9437	2.36114e-05	0.413228	0.365818
Right anterior transverse temporal gyrus (of Heschl)	12945	0.343935	0.0492674	0.055811
Right lateral aspect of the superior temporal gyrus	9813	0.000106697	0.0834309	0.126469
Right planum polare of the superior temporal gyrus	13485	0.655373	0.0262329	0.0388652
Right planum temporale or temporal plane of the superior temporal gyrus	8458	2.66514e-07	0.118005	0.1549
Right inferior temporal gyrus (T3)	5258	5.19203e-16	0.301879	0.353662
Right middle temporal gyrus (T2)	7086	1.55693e-10	0.135915	0.213715
Right horizontal ramus of the anterior segment of the lateral sulcus (or fissure)	9919	0.00015931	0.180717	0.176566
Right vertical ramus of the anterior segment of the lateral sulcus (or fissure)	10599	0.00165356	0.235898	0.194941
Right posterior ramus (or segment) of the lateral sulcus (or fissure)	8019	2.91973e-08	0.308112	0.299845
Right occipital pole	4273	2.47751e-19	0.278102	0.371938
Right temporal pole	6286	9.30531e-13	0.567207	0.528917
Right calcarine sulcus	5603	7.35901e-15	0.201233	0.262547
Right central sulcus (Rolando's fissure)	6285	9.30531e-13	0.263366	0.267896
Right marginal branch (or part) of the cingulate sulcus	6002	1.3627e-13	0.231854	0.265016
Right anterior segment of the circular sulcus of the insula	10626	0.00179397	0.212615	0.186774
Right inferior segment of the circular sulcus of the insula	11942	0.0599978	0.12277	0.141267
Right superior segment of the circular sulcus of the insula	12622	0.211764	0.0733067	0.0707076
Right anterior transverse collateral sulcus	4860	2.28716e-17	0.965306	0.696316
Right posterior transverse collateral sulcus	7691	5.01631e-09	0.235765	0.250448
Right inferior frontal sulcus	9180	7.93422e-06	0.117346	0.151779
Right middle frontal sulcus	12967	0.352669	-0.0490773	-0.0742425
Right superior frontal sulcus	13537	0.683567	-0.0118026	-0.016127
Right sulcus intermedius primus (of Jensen)	11856	0.0498055	-0.0785784	-0.101896
Right intraparietal sulcus (interparietal sulcus) and transverse parietal sulci	9557	3.76029e-05	0.0767052	0.125454
Right middle occipital sulcus and lunatus sulcus	4513	1.80744e-18	0.237856	0.305021
Right superior occipital sulcus and transverse occipital sulcus	4646	4.73369e-18	0.195642	0.275771
Right anterior occipital sulcus and preoccipital notch (temporo-occipital incisure)	6251	7.63355e-13	0.195918	0.244445
Right lateral occipito-temporal sulcus	10871	0.00389693	0.10519	0.130935
Right medial occipito-temporal sulcus (collateral sulcus) and lingual sulcus	9413	2.14867e-05	0.133564	0.176151
Right lateral orbital sulcus	8760	1.18368e-06	0.303591	0.296282
Right medial orbital sulcus (olfactory sulcus)	7665	4.37146e-09	0.460289	0.429926
Right orbital sulci (H-shaped sulci)	9397	2.0442e-05	0.237759	0.282682
Right parieto-occipital sulcus (or fissure)	7982	2.4067e-08	0.129875	0.177929
Right pericallosal sulcus (S of corpus callosum)	9078	5.06959e-06	0.1421	0.173688
Right postcentral sulcus	4468	1.29744e-18	0.322696	0.347979
Right inferior part of the precentral sulcus	10520	0.00127841	0.065464	0.0848272
Right superior part of the precentral sulcus	11549	0.0246724	0.0726982	0.0829703
Right suborbital sulcus (sulcus rostrales, supraorbital sulcus)	8356	1.63917e-07	0.400557	0.375883
Right subparietal sulcus	10989	0.00549557	0.0618111	0.0891808
Right inferior temporal sulcus	12893	0.320839	0.0305198	0.0381951
Right superior temporal sulcus (parallel sulcus)	6873	4.60196e-11	0.124847	0.20191
Right transverse temporal sulcus	12484	0.171227	0.0779341	0.0851018
