# Supplementary material for: Genetic influences on brain representations of natural audiovisual experiences
Source: Research Square preprint supplement (doi:10.21203/rs.3.rs-902535/v2), 2021-09-27
Supplement: Supplementary file 2 [file a8a9814eed30354bfb4087ee.xlsx]

## Sheet: SuppData2
Region name	Noise ceiling
Left thalamus	0.31585
Left caudate	0.298973
Left putamen	0.324566
Left pallidum	0.225072
Brain stem	0.259905
Left hippocampus	0.280946
Left amygdala	0.212468
Left accumbens	0.19592
Right thalamus	0.358368
Right caudate	0.39868
Right putamen	0.312776
Right pallidum	0.194029
Right hippocampus	0.262373
Right amygdala	0.240239
Right accumbens	0.235367
Left fronto-marginal gyrus (of Wernicke) and sulcus	0.396527
Left inferior occipital gyrus (O3) and sulcus	0.526303
Left paracentral lobule and sulcus	0.433183
Left subcentral gyrus (central operculum) and sulci	0.49439
Left transverse frontopolar gyri and sulci	0.386656
Left anterior part of the cingulate gyrus and sulcus (ACC)	0.42449
Left middle-anterior part of the cingulate gyrus and sulcus (aMCC)	0.319547
Left middle-posterior part of the cingulate gyrus and sulcus (pMCC)	0.328679
Left posterior-dorsal part of the cingulate gyrus (dPCC)	0.366257
Left posterior-ventral part of the cingulate gyrus (vPCC, isthmus of the cingulate gyrus)	0.229742
Left cuneus (O6)	0.585732
Left opercular part of the inferior frontal gyrus	0.488141
Left orbital part of the inferior frontal gyrus	0.339412
Left triangular part of the inferior frontal gyrus	0.454438
Left middle frontal gyrus (F2)	0.546154
Left superior frontal gyrus (F1)	0.550254
Left long insular gyrus and central sulcus of the insula	0.320173
Left short insular gyri	0.363793
Left middle occipital gyrus (O2, lateral occipital gyrus)	0.490892
Left superior occipital gyrus (O1)	0.558805
Left lateral occipito-temporal gyrus (fusiform gyrus, O4-T4)	0.533936
Left lingual gyrus, ligual part of the medial occipito-temporal gyrus, (O5)	0.587586
Left parahippocampal gyrus, parahippocampal part of the medial occipito-temporal gyrus, (T5)	0.257448
Left orbital gyri	0.409543
Left angular gyrus	0.551918
Left supramarginal gyrus	0.593733
Left superior parietal lobule (lateral part of P1)	0.608783
Left postcentral gyrus	0.471586
Left precentral gyrus	0.502482
Left precuneus (medial part of P1)	0.639088
Left straight gyrus, Gyrus rectus	0.309035
Left subcallosal area, subcallosal gyrus	0.230816
Left anterior transverse temporal gyrus (of Heschl)	0.439563
Left lateral aspect of the superior temporal gyrus	0.549105
Left planum polare of the superior temporal gyrus	0.260237
Left planum temporale or temporal plane of the superior temporal gyrus	0.538553
Left inferior temporal gyrus (T3)	0.392314
Left middle temporal gyrus (T2)	0.505832
Left horizontal ramus of the anterior segment of the lateral sulcus (or fissure)	0.318232
Left vertical ramus of the anterior segment of the lateral sulcus (or fissure)	0.300487
Left posterior ramus (or segment) of the lateral sulcus (or fissure)	0.445708
Left occipital pole	0.46943
Left temporal pole	0.28086
Left calcarine sulcus	0.489376
Left central sulcus (Rolando's fissure)	0.447843
Left marginal branch (or part) of the cingulate sulcus	0.362645
Left anterior segment of the circular sulcus of the insula	0.329397
Left inferior segment of the circular sulcus of the insula	0.324523
Left superior segment of the circular sulcus of the insula	0.377384
Left anterior transverse collateral sulcus	0.203248
Left posterior transverse collateral sulcus	0.339113
Left inferior frontal sulcus	0.555231
Left middle frontal sulcus	0.459144
Left superior frontal sulcus	0.548611
Left sulcus intermedius primus (of Jensen)	0.410257
Left intraparietal sulcus (interparietal sulcus) and transverse parietal sulci	0.65428
Left middle occipital sulcus and lunatus sulcus	0.53891
Left superior occipital sulcus and transverse occipital sulcus	0.547687
Left anterior occipital sulcus and preoccipital notch (temporo-occipital incisure)	0.568977
Left lateral occipito-temporal sulcus	0.414626
Left medial occipito-temporal sulcus (collateral sulcus) and lingual sulcus	0.434264
Left lateral orbital sulcus	0.348253
Left medial orbital sulcus (olfactory sulcus)	0.267427
Left orbital sulci (H-shaped sulci)	0.367256
Left parieto-occipital sulcus (or fissure)	0.4947
Left pericallosal sulcus (S of corpus callosum)	0.236166
Left postcentral sulcus	0.540771
Left inferior part of the precentral sulcus	0.524142
Left superior part of the precentral sulcus	0.447434
Left suborbital sulcus (sulcus rostrales, supraorbital sulcus)	0.2977
Left subparietal sulcus	0.40566
Left inferior temporal sulcus	0.44255
Left superior temporal sulcus (parallel sulcus)	0.649756
Left transverse temporal sulcus	0.351443
Right fronto-marginal gyrus (of Wernicke) and sulcus	0.369161
Right inferior occipital gyrus (O3) and sulcus	0.573484
Right paracentral lobule and sulcus	0.543804
Right subcentral gyrus (central operculum) and sulci	0.41288
Right transverse frontopolar gyri and sulci	0.408825
Right anterior part of the cingulate gyrus and sulcus (ACC)	0.505615
Right middle-anterior part of the cingulate gyrus and sulcus (aMCC)	0.457462
Right middle-posterior part of the cingulate gyrus and sulcus (pMCC)	0.478151
Right posterior-dorsal part of the cingulate gyrus (dPCC)	0.508736
Right posterior-ventral part of the cingulate gyrus (vPCC, isthmus of the cingulate gyrus)	0.36618
Right cuneus (O6)	0.61398
Right opercular part of the inferior frontal gyrus	0.458003
Right orbital part of the inferior frontal gyrus	0.335685
Right triangular part of the inferior frontal gyrus	0.495375
Right middle frontal gyrus (F2)	0.600758
Right superior frontal gyrus (F1)	0.637117
Right long insular gyrus and central sulcus of the insula	0.228103
Right short insular gyri	0.308738
Right middle occipital gyrus (O2, lateral occipital gyrus)	0.653142
Right superior occipital gyrus (O1)	0.632158
Right lateral occipito-temporal gyrus (fusiform gyrus, O4-T4)	0.513575
Right lingual gyrus, ligual part of the medial occipito-temporal gyrus, (O5)	0.517618
Right parahippocampal gyrus, parahippocampal part of the medial occipito-temporal gyrus, (T5)	0.249936
Right orbital gyri	0.397958
Right angular gyrus	0.692963
Right supramarginal gyrus	0.613922
Right superior parietal lobule (lateral part of P1)	0.617825
Right postcentral gyrus	0.49488
Right precentral gyrus	0.571493
Right precuneus (medial part of P1)	0.708105
Right straight gyrus, Gyrus rectus	0.29492
Right subcallosal area, subcallosal gyrus	0.241848
Right anterior transverse temporal gyrus (of Heschl)	0.326555
Right lateral aspect of the superior temporal gyrus	0.553006
Right planum polare of the superior temporal gyrus	0.298832
Right planum temporale or temporal plane of the superior temporal gyrus	0.521019
Right inferior temporal gyrus (T3)	0.432715
Right middle temporal gyrus (T2)	0.591249
Right horizontal ramus of the anterior segment of the lateral sulcus (or fissure)	0.3257
Right vertical ramus of the anterior segment of the lateral sulcus (or fissure)	0.255381
Right posterior ramus (or segment) of the lateral sulcus (or fissure)	0.332822
Right occipital pole	0.547031
Right temporal pole	0.289989
Right calcarine sulcus	0.535807
Right central sulcus (Rolando's fissure)	0.412123
Right marginal branch (or part) of the cingulate sulcus	0.50158
Right anterior segment of the circular sulcus of the insula	0.27041
Right inferior segment of the circular sulcus of the insula	0.293986
Right superior segment of the circular sulcus of the insula	0.295221
Right anterior transverse collateral sulcus	0.216454
Right posterior transverse collateral sulcus	0.398651
Right inferior frontal sulcus	0.496585
Right middle frontal sulcus	0.48369
Right superior frontal sulcus	0.48568
Right sulcus intermedius primus (of Jensen)	0.421022
Right intraparietal sulcus (interparietal sulcus) and transverse parietal sulci	0.624383
Right middle occipital sulcus and lunatus sulcus	0.53031
Right superior occipital sulcus and transverse occipital sulcus	0.583064
Right anterior occipital sulcus and preoccipital notch (temporo-occipital incisure)	0.48003
Right lateral occipito-temporal sulcus	0.387227
Right medial occipito-temporal sulcus (collateral sulcus) and lingual sulcus	0.460065
Right lateral orbital sulcus	0.295192
Right medial orbital sulcus (olfactory sulcus)	0.274957
Right orbital sulci (H-shaped sulci)	0.34989
Right parieto-occipital sulcus (or fissure)	0.560223
Right pericallosal sulcus (S of corpus callosum)	0.471643
Right postcentral sulcus	0.465852
Right inferior part of the precentral sulcus	0.503623
Right superior part of the precentral sulcus	0.413856
Right suborbital sulcus (sulcus rostrales, supraorbital sulcus)	0.301741
Right subparietal sulcus	0.569451
Right inferior temporal sulcus	0.38931
Right superior temporal sulcus (parallel sulcus)	0.623533
Right transverse temporal sulcus	0.324028
